# Supplementary material
Source: PubMed Central journal article supplement (PMC4877275)
Supplement: NIHMS771102-supplement-1.pdf [file NIHMS771102-supplement-1.pdf]

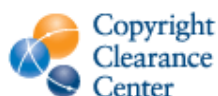

RightsLink®

[Home](#)[Account Info](#)[Help](#)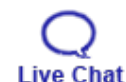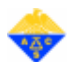ACS Publications  
Most Trusted. Most Cited. Most Read.

**Title:** Capturing Spontaneous Membrane Insertion of the Influenza Virus Hemagglutinin Fusion Peptide

Logged in as:  
Javier Baylon  
Account #:  
3001000426

**Author:** Javier L. Baylon, Emad Tajkhorshid

[LOGOUT](#)

**Publication:** The Journal of Physical Chemistry B

**Publisher:** American Chemical Society

**Date:** Jun 1, 2015

Copyright © 2015, American Chemical Society

### PERMISSION/LICENSE IS GRANTED FOR YOUR ORDER AT NO CHARGE

This type of permission/license, instead of the standard Terms & Conditions, is sent to you because no fee is being charged for your order. Please note the following:

- Permission is granted for your request in both print and electronic formats, and translations.
- If figures and/or tables were requested, they may be adapted or used in part.
- Please print this page for your records and send a copy of it to your publisher/graduate school.
- Appropriate credit for the requested material should be given as follows: "Reprinted (adapted) with permission from (COMPLETE REFERENCE CITATION). Copyright (YEAR) American Chemical Society." Insert appropriate information in place of the capitalized words.
- One-time permission is granted only for the use specified in your request. No additional uses are granted (such as derivative works or other editions). For any other uses, please submit a new request.

If credit is given to another source for the material you requested, permission must be obtained from that source.

[BACK](#)[CLOSE WINDOW](#)

Copyright © 2016 [Copyright Clearance Center, Inc.](#) All Rights Reserved. [Privacy statement.](#) [Terms and Conditions.](#)  
Comments? We would like to hear from you. E-mail us at [customercare@copyright.com](mailto:customercare@copyright.com)
